# Supplementary material
Source: PubMed Central journal article supplement (PMC3698388)

# SUPPLEMENTARY DATA

FIG. S1. (A) The principle of sensor excitation by the camera system, and (B) the technical set-up.

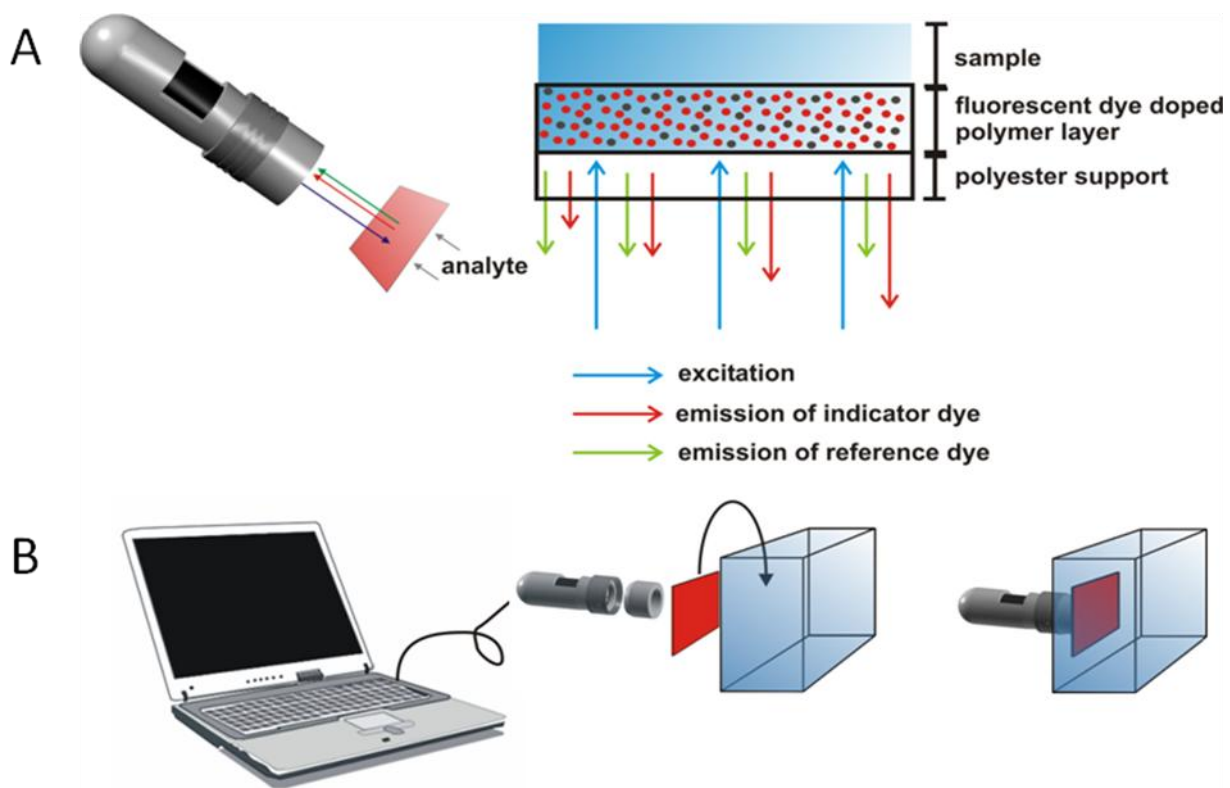

FIG. S2. Procedure for ratiometric image analysis. The original RGB image is split into the red and green channels, and the ratio of the channels is displayed using false colours.

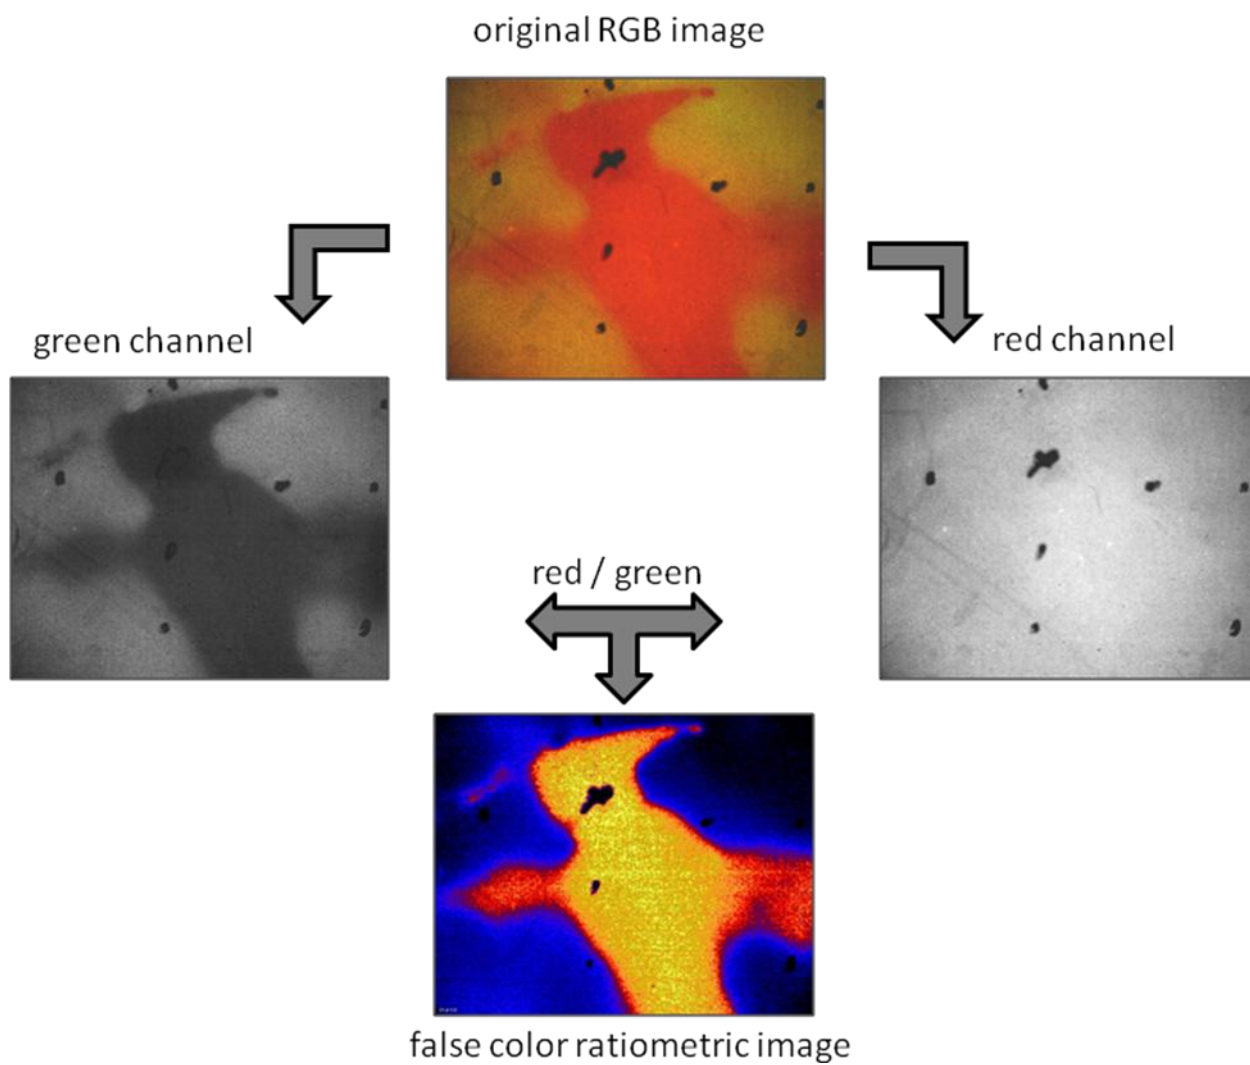

FIG. S3. A typical calibration response of the pH sensor and the corresponding Boltzman fit for pH calculation.

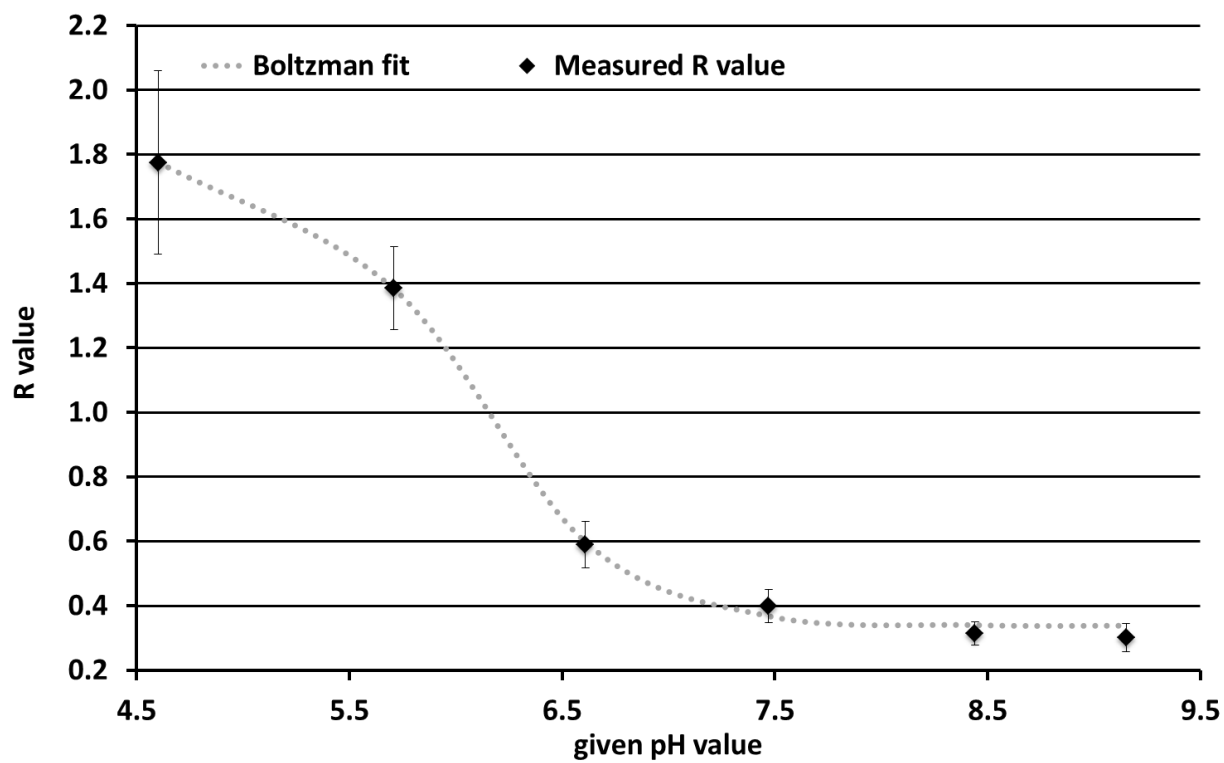

FIG. S4. A typical calibration response of the CO<sub>2</sub> sensor and the corresponding Boltzman fit for CO<sub>2</sub> calculation.

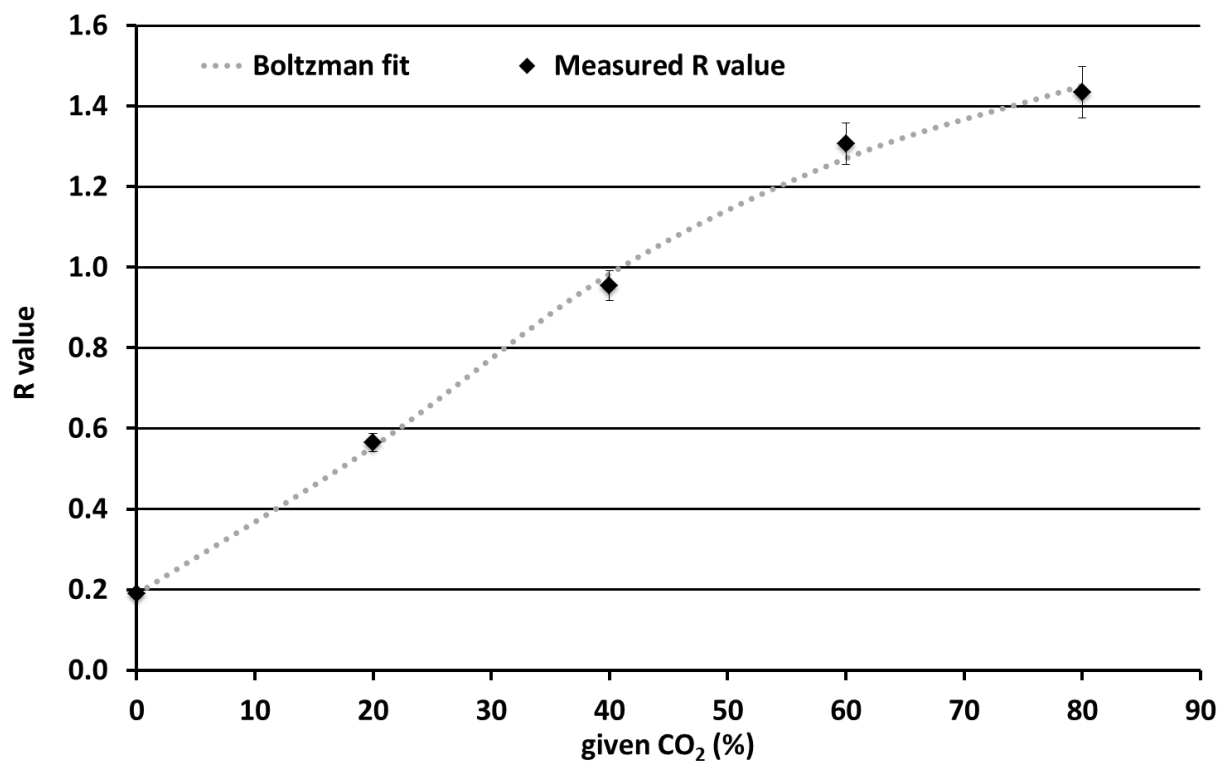

Supplement: supp_mct047_mct047supp.pdf [file supp_mct047_mct047supp.pdf]
